# Supplementary material for: Up-conversion emission and in vitro cytotoxicity characterization of blue emitting, biocompatible SrTiO3 nanoparticles activated with Tm3+ and Yb3+ ions
Source: Royal Society of Chemistry journal article supplement (doi:10.1039/c6ra03075k), 2016-01-01
Supplement: c6ra03075k1.pdf [file c6ra03075k1.pdf]

## Supporting information

### **Up-conversion emission and *in vitro* cytotoxicity characterization of blue emitting, biocompatible SrTiO<sub>3</sub> nanoparticles activated with Tm<sup>3+</sup> and Yb<sup>3+</sup> ions**

R. Pazik<sup>1\*</sup>, A. Zięcina<sup>1</sup>, B. Poźniak<sup>2</sup>, M. Malecka<sup>1</sup>, L. Marciniak<sup>1</sup>, and R.J. Wiglusz<sup>1</sup>

<sup>1</sup>*Institute of Low Temperature and Structure Research, PAS, Okólna 2, 50-422 Wrocław, Poland*

<sup>2</sup>*Department of Biochemistry, Pharmacology and Toxicology, Wrocław University of Environmental and Life Sciences, C.K. Norwida 31, 50-375 Wrocław, Poland*

\*Corresponding author:

[R.Pazik@int.pan.wroc.pl](mailto:R.Pazik@int.pan.wroc.pl)

Table s1. Comparison of crystallite size estimated using Scherrer's method and TEM analysis

| Sample  | Crystallite size based on<br>Scherrer's method (nm) | Particle size based<br>on TEM (nm) |
|---------|-----------------------------------------------------|------------------------------------|
| 600 °C  | 18                                                  | 20                                 |
| 700 °C  | 19                                                  | 25                                 |
| 800 °C  | 22                                                  | 30                                 |
| 900 °C  | 26                                                  | 42                                 |
| 1000 °C | 38                                                  | 90                                 |

## SEM-EDS analysis

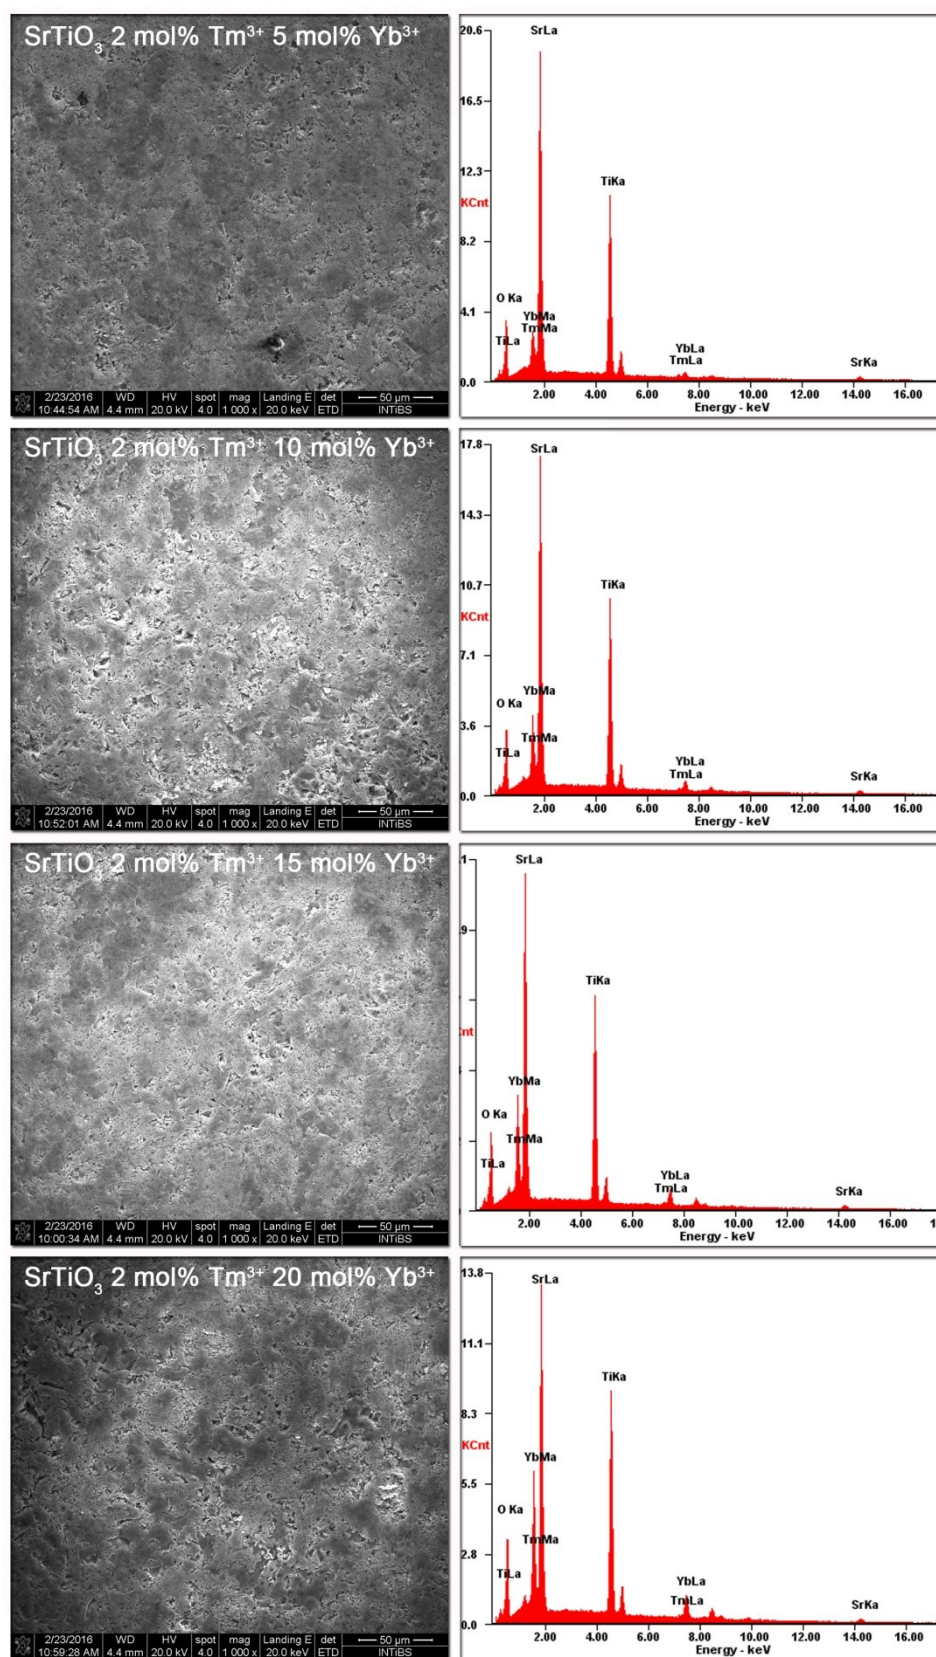

Figure s1. Representative data of SEM-EDS measurements of the  $\text{SrTiO}_3$  2 mol%  $\text{Tm}^{3+}$  x mol%  $\text{Yb}^{3+}$  nanoparticles

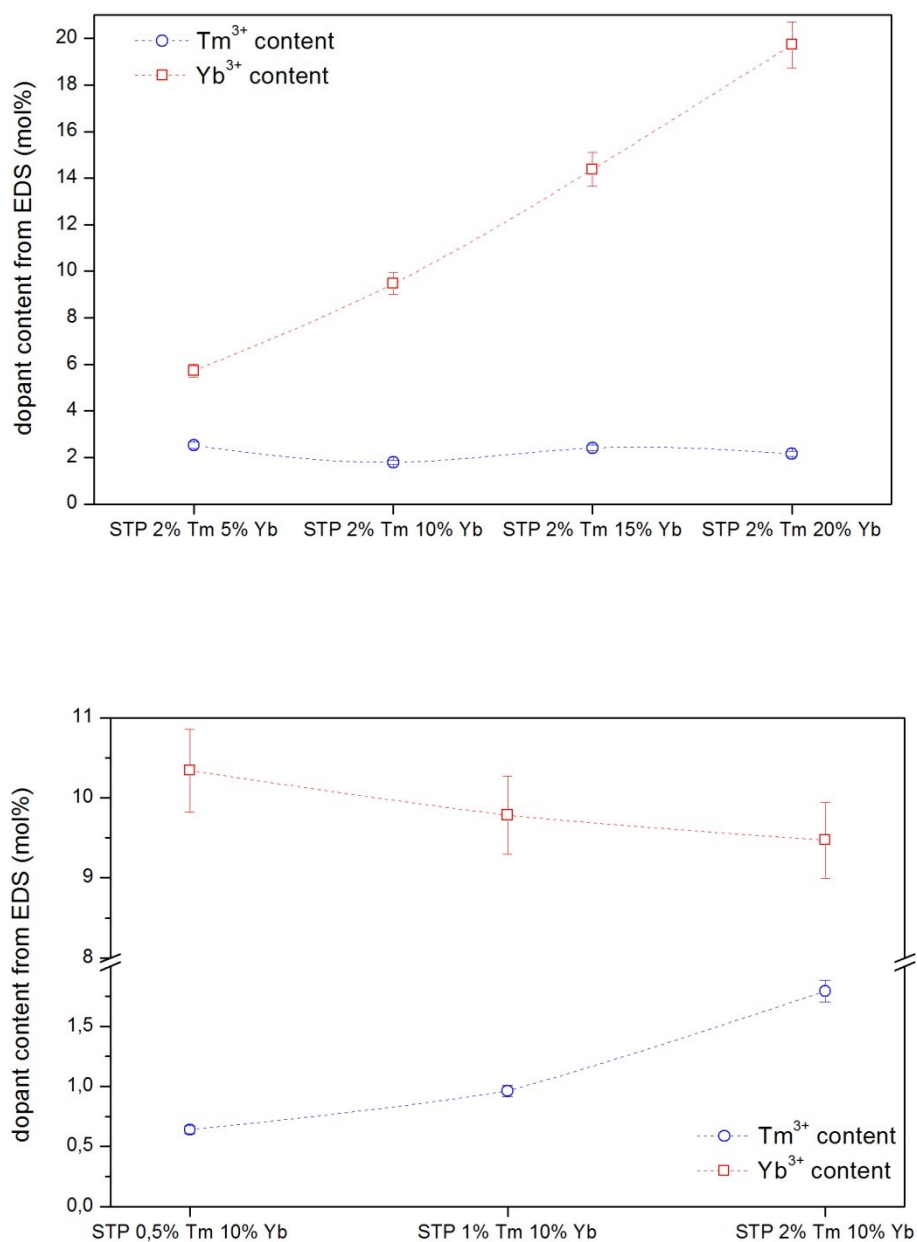

Figure s2. Representative data of EDS analysis of the SrTiO<sub>3</sub> nanoparticles (upper) 2 mol% Tm<sup>3+</sup> x mol% Yb<sup>3+</sup>, (bottom) x mol% Tm<sup>3+</sup> 10 mol% Yb<sup>3+</sup>

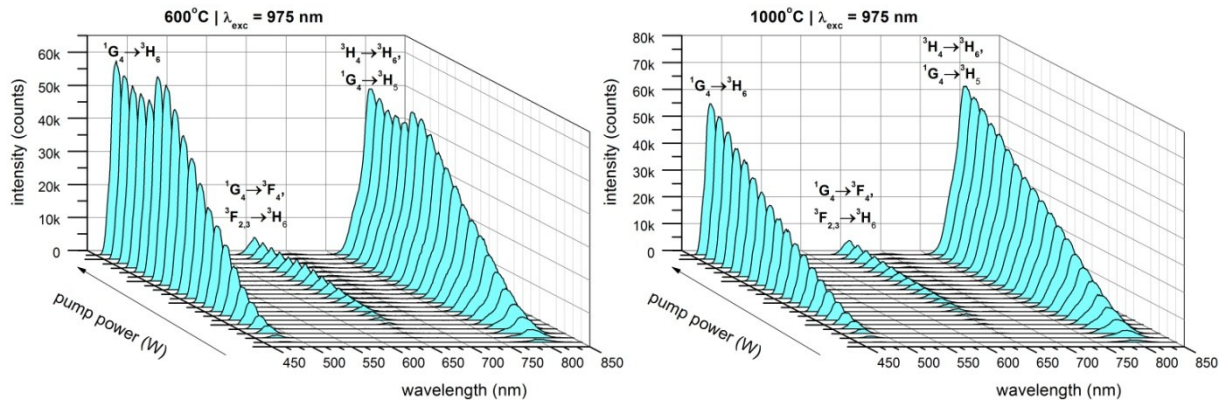

Figure s3. Representative power dependence spectra of the SrTiO<sub>3</sub> nanoparticles doped with 0.5 mol% Tm<sup>3+</sup> and 5 mol% Yb<sup>3+</sup> ions as a function of annealing temperature (600 °C and 1000 °C).

**SrTiO<sub>3</sub>: 0.5% Tm<sup>3+</sup> / x% Yb<sup>3+</sup>  $\lambda_{exc} = 975$  nm**

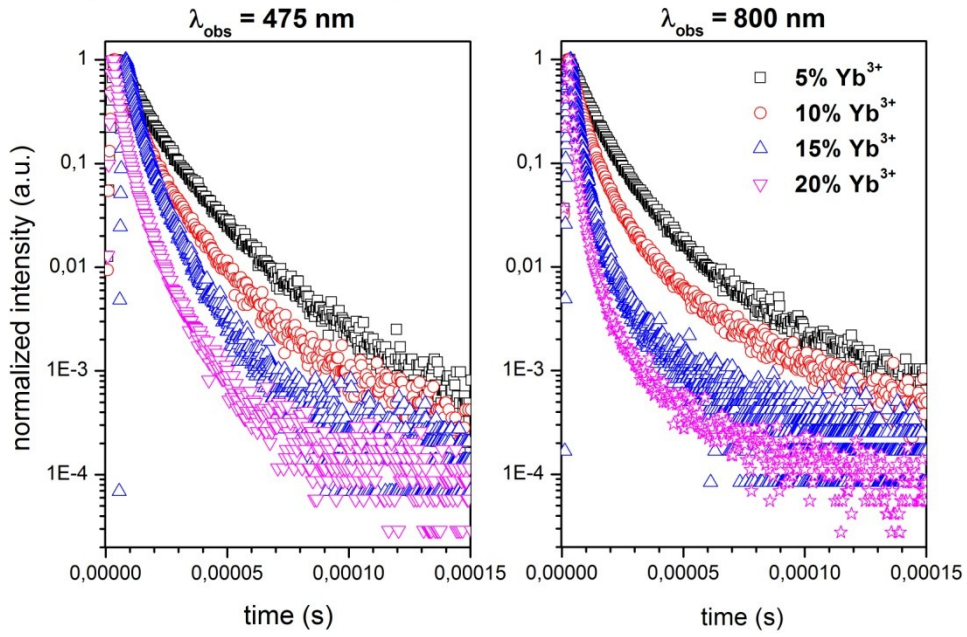

**SrTiO<sub>3</sub>: x% Tm<sup>3+</sup> / 5% Yb<sup>3+</sup>  $\lambda_{exc} = 975$  nm**

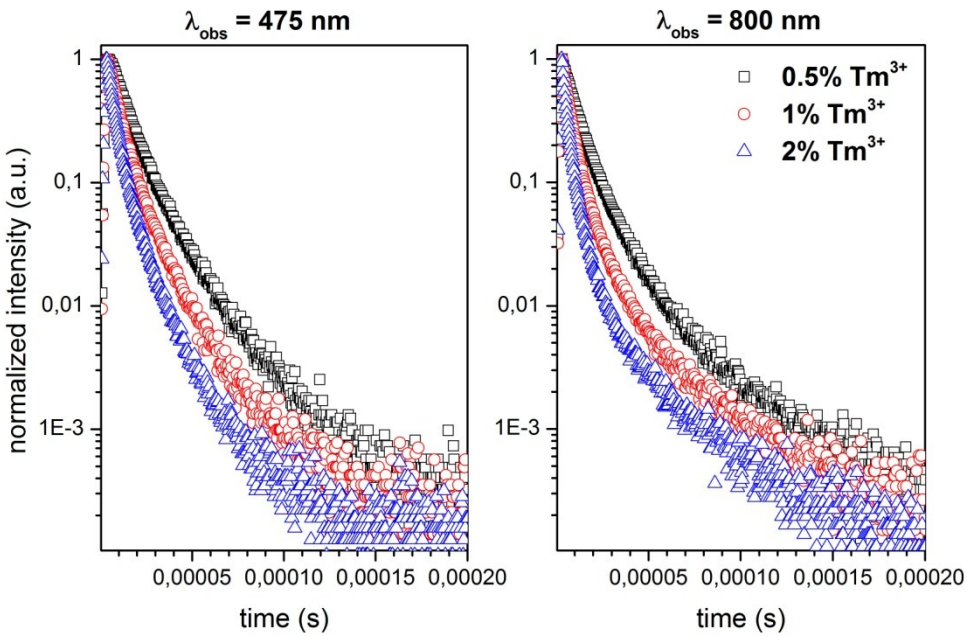

Figure s4. Effect of Tm<sup>3+</sup> (up) and Yb<sup>3+</sup> (bottom) doping on decay curves of blue and red emission of the SrTiO<sub>3</sub> particles.

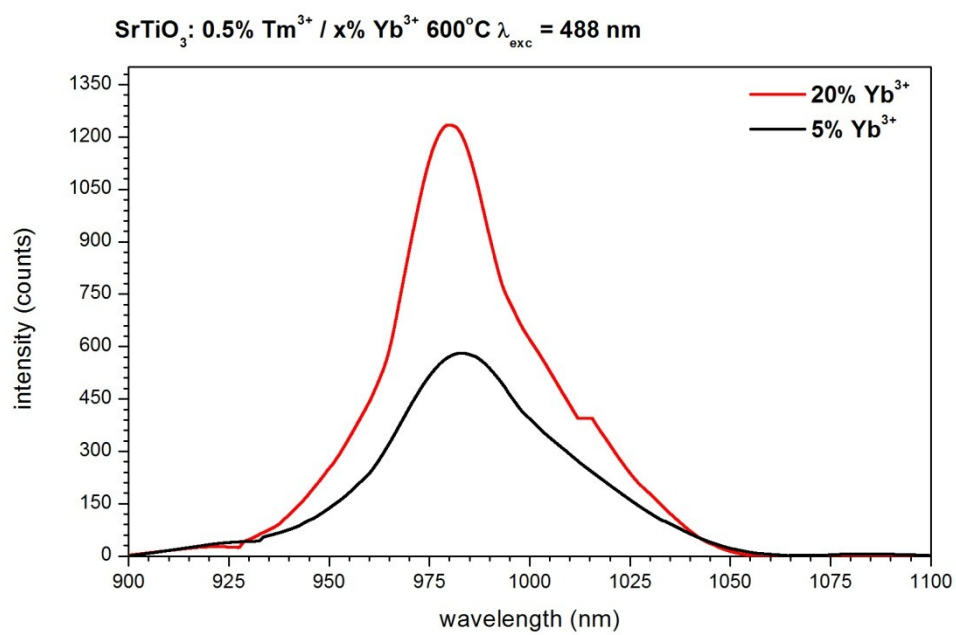

Figure s5. Back-transfer of Tm<sup>3+</sup> to Yb<sup>3+</sup> of SrTiO<sub>3</sub> nanoparticles sintered at 600°C upon direct excitation of Tm<sup>3+</sup> with 488 nm laser line.
